# Supplementary material
Source: Springer Nature journal article supplement (https://www.springermedizin.de/resource/supplementary/12877_2012_919_MOESM1_ESM.pdf/9440400)

# EQ-5D-3L score and severity of vertebral fracture

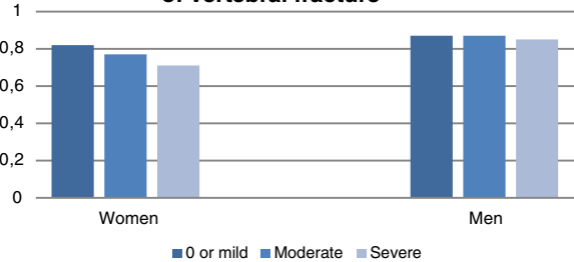

Supplement: MOESM1 [file 9440400]
